# Supplementary material for: Two new species of Eleutherodactylus from western and central Mexico ( Eleutherodactylus jamesdixoni sp. nov., Eleutherodactylus humboldti sp. nov.)
Source: PeerJ journal article supplement (doi:10.7717/peerj.14985), 2023-03-08

*E. zeus* USNM 335740  
*E. symingtoni* No voucher

0.1 substitutions/site

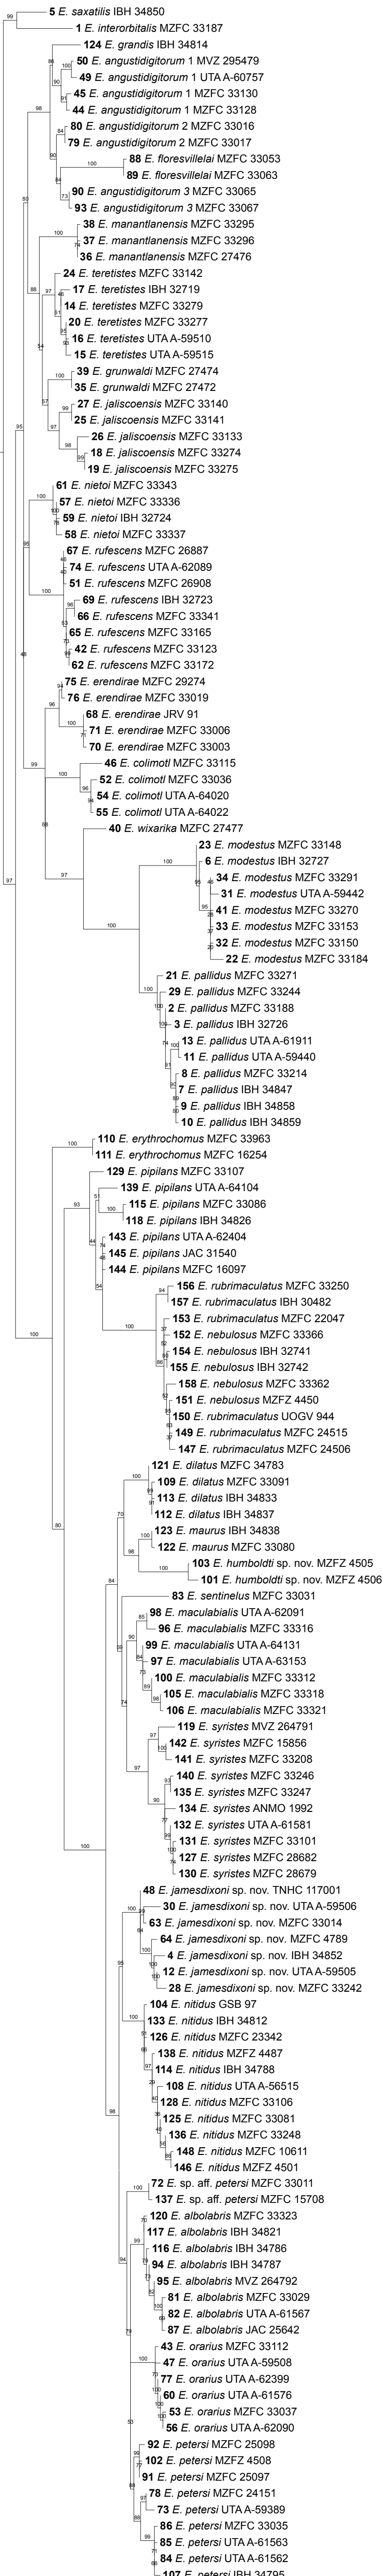

Supplement: Figure_S1_NEW__80851_JT_staff.pdf [file Figure_S1_NEW__80851_JT_staff.pdf]
