# Supplementary material for: Two new species of Eleutherodactylus from western and central Mexico (Eleutherodactylus jamesdixoni sp. nov., Eleutherodactylus humboldti sp. nov.)
Source: PeerJ. 2023 Mar 8;11:e14985. doi: 10.7717/peerj.14985 (PMC10007972; doi:10.7717/peerj.14985)
Supplement: Supplemental Information 1 [file peerj-11-14985-s001.csv]

N160_Map_number	Species	Sample	Specimen_voucher	TipLabel	16SGenBank	Latitude	Longitude	Country	State	Locality
81	E. albolabris	CIG 331	MZFC 33029	E. albolabris MT872482	MT872482	17.87991	-101.35698	Mexico	Guerrero	12 km W of Vallectios on Zihuatanejo-Altamirano Hwy.
82	E. albolabris	JAC 25298	UTA A-61567	E. albolabris JAC 25298	OQ145175	18.04381	-101.30108	Mexico	Guerrero	Rd W to Zihuaquio from Vallecitos
87	E. albolabris	JAC 25642		E. albolabris MT872448	MT872448	17.6545	-100.96376	Mexico	Guerrero	Carretera Coyuquilla-El Durazno
94	E. albolabris	TJD 768	IBH 34787	E. albolabris TJD 768	OQ145179	17.25506	-100.34736	Mexico	Guerrero	15.9 km (by road) NW Atoyac de Álvarez on road to El Paraíso
95	E. albolabris	TJD 767	MVZ 264792	E. albolabris TJD 767	OQ145178	17.25506	-100.34736	Mexico	Guerrero	15.9 km (by road) NW Atoyac de Álvarez on road to El Paraíso
116	E. albolabris	TJD 737	IBH 34786	E. albolabris TJD 737	OQ145177	17.3455	-99.47697	Mexico	Guerrero	0.5 km (by road) east of MX 95 libre on road to Acahuizotla
117	E. albolabris	TJD 838	IBH 34821	E. albolabris TJD 838	OQ145182	17.35302	-99.47353	Mexico	Guerrero	~1.8 km (by road) east of MX 95 libre on road to Acahuizotla
120	E. albolabris	CIG 953	MZFC 33323	E. albolabris MG856956	MG856956	17.3289	-99.46985	Mexico	Guerrero	Agua del Obispo
	E. albolabris	CDR 148	MZFC 23878	E. albolabris CDR 148	OQ145174	17.28253	-99.48522	Mexico	Guerrero	Carr. Libre Chilpancingo-Tierra Colorada
	E. albolabris	CIG 330	MZFC 33028	E. albolabris MT872481	MT872481	17.87991	-101.35698	Mexico	Guerrero	12 km W of Vallectios on Zihuatanejo-Altamirano Hwy.
	E. albolabris	CIG 332	MZFC 33030	E. albolabris MT872483	MT872483	17.9263	-101.29296	Mexico	Guerrero	3 km E of Vallecitos on Zihuatanejo-Altamirano Hwy.
	E. albolabris	CIG 391	MZFC 33083	E. albolabris MG856955	MG856955	17.3289	-99.46985	Mexico	Guerrero	Agua del Obispo
	E. albolabris	CIG 441	MZFC 33108	E. albolabris MT872476	MT872476	17.02109	-98.73568	Mexico	Guerrero	One town below Tilapa de Guerrero, San Luis Acatlán-Tlapa de Comonfort Hwy.
	E. albolabris	GCG 919		E. albolabris MZ203208	MZ203208			Mexico	Guerrero	Juan R. Escudero
	E. albolabris	JAC 25414	UTA A-61573	E. albolabris JAC 25414	OQ145176	18.51231	-102.44801	Mexico	Michoacán	Rd Playitas from Tumbiscatio
	E. albolabris	JAC 25586	UTA A-61577	E. albolabris JAC 25586	MT872447	17.25632	-100.30812	Mexico	Guerrero	Carretera Atoyac de Alvarez-Nueva Delhi
	E. albolabris	TJD 836	IBH 34819	E. albolabris TJD 836	OQ145180	17.35348	-99.47315	Mexico	Guerrero	~1.8 km (by road) east of MX 95 libre on road to Acahuizotla
	E. albolabris	TJD 837	IBH 34820	E. albolabris TJD 837	OQ145181	17.35337	-99.47321	Mexico	Guerrero	~1.8 km (by road) east of MX 95 libre on road to Acahuizotla
	E. albolabris	TJD 840	IBH 34823	E. albolabris TJD 840	OQ145183	17.35315	-99.47313	Mexico	Guerrero	~1.8 km (by road) east of MX 95 libre on road to Acahuizotla
44	E. angustidigitorum	CIG 477	MZFC 33128	E. angustidigitorum 1 MG856963	MG856963	19.98012	-103.78689	Mexico	Jalisco	Las Piedrotas, Tapalpa
45	E. angustidigitorum	CIG 479	MZFC 33130	E. angustidigitorum 1 MG856964	MG856964	19.98012	-103.78689	Mexico	Jalisco	Las Piedrotas, Tapalpa
49	E. angustidigitorum 1	JAC 23974	UTA A-60757	E. angustidigitorum 1 JAC 23974	OQ145185	19.61949	-103.56659	Mexico	Jalisco	Nevado de Colima Refugio de Montaña
50	E. angustidigitorum 1	SMR 1694	MVZ 295479	E. angustidigitorum 1 SMR 1694	MZ203189	19.58531	-103.55506	Mexico	Jalisco	5.0 km SW (by air) of El Fresnillo, NE slope Nevado de Colima
	E. angustidigitorum 1	JAC 23971	UTA A-60754	E. angustidigitorum 1 JAC 23971	OQ145184	19.61949	-103.56659	Mexico	Jalisco	Nevado de Colima, Refugio de montaña
79	E. angustidigitorum 2	CIG 318	MZFC 33017	E. angustidigitorum 2 MG856959	MG856959	19.45898	-102.09654	Mexico	Michoacán	W of Uruapan
80	E. angustidigitorum 2	CIG 317	MZFC 33016	E. angustidigitorum 2 MG856958	MG856958	19.67483	-101.97835	Mexico	Michoacán	N of Cherán
	E. angustidigitorum 2	CIG 316	MZFC 33015	E. angustidigitorum 2 MG856957	MG856957	19.67483	-101.97835	Mexico	Michoacán	N of Cherán
90	E. angustidigitorum 3	CIG 373	MZFC 33065	E. angustidigitorum 3 MG856960	MG856960	19.65029	-100.94524	Mexico	Michoacán	Hwy. 15 libre, at junction with Tzitzio Rd.
93	E. angustidigitorum 3	CIG 375	MZFC 33067	E. angustidigitorum 3 MG856961	MG856961	19.66788	-100.90521	Mexico	Michoacán	Hwy. 15 libre, several km E of Tzitzio Rd., where road hits 2470 m elev.
	E. angustidigitorum 3	CIG 378	MZFC 33070	E. angustidigitorum 3 MG856962	MG856962	19.66788	-100.90521	Mexico	Michoacán	Hwy. 15 libre, several km E of Tzitzio Rd., where road hits 2470 m elev.
46	E. colimotl	CIG 462	MZFC 33115	E. colimotl MG856971	MG856971	19.0617	-103.78118	Mexico	Colima	Hwy. 54 frontage rd., just N of Ixtlahuacán Rd.
52	E. colimotl	CIG 340	MZFC 33036	E. colimotl MG856967	MG856967	18.58227	-103.5222	Mexico	Michoacán	0.6 km W of bridge on S entrance to Aquila, on La Placita-Aquila Rd.
54	E. colimotl	JAC 23999	UTA A-64020	E. colimotl JAC 23999	OQ145187	18.58503	-103.51628	Mexico	Michoacán	Carretera de Mex 200 hacia Aquila
55	E. colimotl	JAC 24001	UTA A-64022	E. colimotl JAC 24001	OQ145189	18.58503	-103.51628	Mexico	Michoacán	Carretera de Mex 200 hacia Aquila
	E. colimotl	CIG 464	MZFC 33117	E. colimotl MG856972	MG856972	19.0617	-103.78118	Mexico	Colima	Hwy. 54 frontage rd., just N of Ixtlahuacán Rd.
	E. colimotl	JAC 24000	UTA A-64021	E. colimotl JAC 24000	OQ145188	18.58503	-103.51628	Mexico	Michoacán	Carretera de Mex 200 hacia Aquila
109	E. dilatus	CIG 407	MZFC 33091	E. dilatus MG856973	MG856973	17.55665	-99.67213	Mexico	Guerrero	1.6 km E of Omiltemi
112	E. dilatus	TJD 857	IBH 34837	E. dilatus TJD 857	OQ145194	17.43634	-99.50857	Mexico	Guerrero	~7.4 km (by road) W of Mazatlán (measured from MEX 95 libre) on road to Tejocote
113	E. dilatus	TJD 853	IBH 34833	E. dilatus TJD 853	OQ145190	17.43621	-99.50684	Mexico	Guerrero	~7.3 km (by road) W of Mazatlán (measured from MEX 95 libre) on road to Tejocote
121	E. dilatus	RPA 302	MZFC 34783	E. dilatus MZ203203	MZ203203	17.39592	-99.33838	Mexico	Guerrero	730 m NE of Coaxtlahuacán
	E. dilatus	CIG 408	MZFC 33092	E. dilatus MG856974	MG856974	17.55665	-99.67213	Mexico	Guerrero	1.6 km E of Omiltemi
	E. dilatus	TJD 854	IBH 34834	E. dilatus TJD 854	OQ145191	17.43658	-99.50766	Mexico	Guerrero	~7.3 km (by road) W of Mazatlán (measured from MEX 95 libre) on road to Tejocote
	E. dilatus	TJD 855	IBH 34835	E. dilatus TJD 855	OQ145192	17.43635	-99.50803	Mexico	Guerrero	~7.4 km (by road) W of Mazatlán (measured from MEX 95 libre) on road to Tejocote
	E. dilatus	TJD 856	IBH 34836	E. dilatus TJD 856	OQ145193	17.43642	-99.50828	Mexico	Guerrero	~7.4 km (by road) W of Mazatlán (measured from MEX 95 libre) on road to Tejocote
68	E. erendirae	JRV 91		E. erendirae MG856979	MG856979			Mexico	Jalisco
70	E. erendirae	CIG 303	MZFC 33003	E. erendirae MG856975	MG856975	19.68532	-102.92455	Mexico	Jalisco	El Montoso
71	E. erendirae	CIG 306	MZFC 33006	E. erendirae MG856976	MG856976	19.68532	-102.92455	Mexico	Jalisco	El Montoso
75	E. erendirae	CIG 319	MZFC 29274	E. erendirae MG856980	MG856980	19.33798	-102.26986	Mexico	Michoacán	Aparícuaro
76	E. erendirae	CIG 320	MZFC 33019	E. erendirae MG856981	MG856981	19.33798	-102.26986	Mexico	Michoacán	Aparícuaro
	E. erendirae	CIG 308	MZFC 33008	E. erendirae MG856977	MG856977	19.68532	-102.92455	Mexico	Jalisco	El Montoso
	E. erendirae	CIG 309	MZFC 33009	E. erendirae MZ203198	MZ203198	19.68532	-102.92455	Mexico	Jalisco	El Montoso
	E. erendirae	CIG 322	MZFC 33021	E. erendirae MG856982	MG856982	19.33798	-102.26986	Mexico	Michoacán	Aparícuaro
	E. erendirae	JRV 90		E. erendirae MG856978	MG856978	19.71044	-102.92996	Mexico	Jalisco	Sierra de Mazamitla, Road from Valle de Juarez to Manuel M. Dieguez
110	E. erythrochomus	RPA 183	MZFC 33963	E. erythrochomus MZ203201	MZ203201	17.1345	-99.5445	Mexico	Guerrero	Carretera Omitlán-La Venta (Hwy 95)
111	E. erythrochomus	JAC 21929	MZFC 16254	E. erythrochomus EU186711	EU186711	17.1391	-99.536	Mexico	Guerrero	Carretera Tierra Colorada-Ayutla
	E. erythrochomus	EPR 1559	UTA A-65751	E. erythrochomus EPR 1559	OQ145195	17.11903	-99.51896	Mexico	Guerrero	Juan R. Escudero, 3.5 km W Omitlán, en la desviación hacia Omitlán de la carretera Tierra Colorada-Ayutla de los Libres
	E. erythrochomus	RPA 185	MZFC 33965	E. erythrochomus MZ203202	MZ203202	17.1345	-99.5445	Mexico	Guerrero	Carretera Omitlán-La Venta (Hwy 95)
88	E. floresvillelai	CIG 361	MZFC 33053	E. floresvillelai MG856983	MG856983	19.65029	-100.94524	Mexico	Michoacán	Hwy. 15 libre, at junction with Tzitzio Rd.
89	E. floresvillelai	CIG 371	MZFC 33063	E. floresvillelai MZ203188	MZ203188	19.65029	-100.94524	Mexico	Michoacán	Hwy. 15 libre, at junction with Tzitzio Rd.
	E. floresvillelai	CIG 362	MZFC 33054	E. floresvillelai MG856984	MG856984	19.65029	-100.94524	Mexico	Michoacán	Hwy. 15 libre, at junction with Tzitzio Rd.
	E. floresvillelai	CIG 364	MZFC 33056	E. floresvillelai MG856985	MG856985	19.65029	-100.94524	Mexico	Michoacán	Hwy. 15 libre, at junction with Tzitzio Rd.
	E. floresvillelai	CIG 366	MZFC 33058	E. floresvillelai MG856986	MG856986	19.65029	-100.94524	Mexico	Michoacán	Hwy. 15 libre, at junction with Tzitzio Rd.
	E. floresvillelai	CIG 367	MZFC 33059	E. floresvillelai MG856987	MG856987	19.65029	-100.94524	Mexico	Michoacán	Hwy. 15 libre, at junction with Tzitzio Rd.
	E. floresvillelai	CIG 369	MZFC 33061	E. floresvillelai MG856988	MG856988	19.65029	-100.94524	Mexico	Michoacán	Hwy. 15 libre, at junction with Tzitzio Rd.
124	E. grandis	TJD 831	IBH 34814	E. grandis TJD 831	MG856989	19.31777	-99.19711	Mexico	Distrito Federal	jardín botánico, UNAM
	E. grandis	TJD 832	IBH 34815	E. grandis TJD 832	OQ145196	19.31777	-99.19711	Mexico	Distrito Federal	jardín botánico, UNAM
35	E. grunwaldi	JRV 139	MZFC 27472	E. grunwaldi MG856990	MG856990	19.43161	-103.97871	Mexico	Colima	Sierra de Manantlán, road to El Terrero
39	E. grunwaldi	JRV 142	MZFC 27474	E. grunwaldi MG856993	MG856993	19.43224	-103.95727	Mexico	Jalisco	Sierra de Manantlán, road to El Terrero
	E. grunwaldi	JRV 255		E. grunwaldi MG856991	MG856991			Mexico	Jalisco
	E. grunwaldi	JRV 257		E. grunwaldi MG856992	MG856992			Mexico	Jalisco
101	E. humboldti sp. nov.	TJD 1308	MZFZ 4506	E. humboldti sp. nov. TJD 1308	OQ145203	19.15383	-100.14292	Mexico	México	Hotel Las Piñas Avándaro
103	E. humboldti sp. nov.	TJD 1307	MZFZ 4505	E. humboldti sp. nov. TJD 1307	OQ145202	19.09433	-100.08279	Mexico	México	Valle de Bravo, Rancho El Pinal
	E. humboldti sp. nov.	TJD 1305	MZFZ 4503	E. humboldti sp. nov. TJD 1305	OQ145200	19.09433	-100.08279	Mexico	México	Valle de Bravo, Rancho El Pinal
	E. humboldti sp. nov.	TJD 1306	MZFZ 4504	E. humboldti sp. nov. TJD 1306	OQ145201	19.09433	-100.08279	Mexico	México	Valle de Bravo, Rancho El Pinal
	E. humboldti sp. nov.	TJD 833	IBH 34816	E. humboldti sp. nov. TJD 833	OQ145197	19.09	-100.07779	Mexico	México	Valle de Bravo, Rancho El Pinal
	E. humboldti sp. nov.	TJD 834	IBH 34817	E. humboldti sp. nov. TJD 834	OQ145198	19.09	-100.07779	Mexico	México	Valle de Bravo, Rancho El Pinal
	E. humboldti sp. nov.	TJD 835	IBH 34818	E. humboldti sp. nov. TJD 835	OQ145199	19.09	-100.07779	Mexico	México	Valle de Bravo, Rancho El Pinal
1	E. interorbitalis	CIG 585	MZFC 33187	E. interorbitalis MG856996	MG856996	23.73584	-106.59626	Mexico	Sinaloa	59 km N of Mazatlán
	E. interorbitalis	CIG 584	MZFC 33186	E. interorbitalis MG856995	MG856995	23.73584	-106.59626	Mexico	Sinaloa	59 km N of Mazatlán
	E. interorbitalis	TJD 919	IBH 34853	E. interorbitalis TJD 919	OQ145204	24.39694	-106.75253	Mexico	Sinaloa	6.3 km south of Cosalá (by road) on Hwy. 8
	E. interorbitalis	TJD 921	IBH 34855	E. interorbitalis TJD 921	OQ145205	24.39705	-106.75232	Mexico	Sinaloa	6.3 km south of Cosalá (by road) on Hwy. 8
	E. interorbitalis	TJD 922	IBH 34856	E. interorbitalis TJD 922	OQ145206	24.39705	-106.75232	Mexico	Sinaloa	6.3 km south of Cosalá (by road) on Hwy. 8
18	E. jaliscoensis	CIG 861	MZFC 33274	E. jaliscoensis MG857002	MG857002	20.69802	-104.86718	Mexico	Jalisco	W of Mascota
19	E. jaliscoensis	CIG 862	MZFC 33275	E. jaliscoensis MG857003	MG857003	20.69802	-104.86718	Mexico	Jalisco	W of Mascota
25	E. jaliscoensis	CIG 490	MZFC 33141	E. jaliscoensis MG856997	MG856997	20.20854	-104.7478	Mexico	Jalisco	Bosque de Maple Trailhead, below Peña del Cuervo, Cumbre de Guadalupe, Talpa de Allende
26	E. jaliscoensis	CIG 482	MZFC 33133	E. jaliscoensis MG857005	MG857005	20.21916	-104.73579	Mexico	Jalisco	Peña del Cuervo, near Cumbre de Guadalupe, Talpa de Allende
27	E. jaliscoensis	CIG 489	MZFC 33140	E. jaliscoensis MG857001	MG857001	20.21381	-104.73072	Mexico	Jalisco	banco de arena next to Peña del Cuervo, Talpa de Allende
	E. jaliscoensis	CIG 480	MZFC 33131	E. jaliscoensis MG856998	MG856998	20.21916	-104.73579	Mexico	Jalisco	Peña del Cuervo, near Cumbre de Guadalupe, Talpa de Allende
	E. jaliscoensis	CIG 485	MZFC 33136	E. jaliscoensis MG856999	MG856999	20.21916	-104.73579	Mexico	Jalisco	Peña del Cuervo, near Cumbre de Guadalupe, Talpa de Allende
	E. jaliscoensis	CIG 486	MZFC 33137	E. jaliscoensis MG857000	MG857000	20.21381	-104.73072	Mexico	Jalisco	banco de arena next to Peña del Cuervo, Talpa de Allende
	E. jaliscoensis	CIG 863	MZFC 33276	E. jaliscoensis MG857004	MG857004	20.69802	-104.86718	Mexico	Jalisco	W of Mascota
4	E. jamesdixoni sp. nov.	TJD 897	IBH 34852	E. jamesdixoni sp. nov. TJD 897	OQ145213	23.50418	-105.83701	Mexico	Sinaloa	carretera Concordia a Durango, 7.7 miles west of El Palmito
12	E. jamesdixoni sp. nov.	JAC 23704	UTA A-59505	E. jamesdixoni sp. nov. JAC 23704	OQ145207	20.74598	-104.89349	Mexico	Jalisco	Carretera La Estancia-La Mascota
28	E. jamesdixoni sp. nov.	CIG 687	MZFC 33242	E. jamesdixoni sp. nov. MG857035	MG857035	21.28	-104.68	Mexico	Nayarit	Tepetiltic
30	E. jamesdixoni sp. nov.	JAC 23782	UTA A-59506	E. jamesdixoni sp. nov. JAC 23782	OQ145208	20.36974	-104.60254	Mexico	Jalisco	Carretera entre Las Cruces y Atenguillo Mex 90, Puente La Piedra China
48	E. jamesdixoni sp. nov.	JSR 580A	TNHC 117001	E. jamesdixoni sp. nov. JSR 580A	OQ145209	22.8664	-103.58277	Mexico	Zacatecas	Talus que está 5.5 km. al Oeste de Mimbres, Valparaíso, Zacatecas, en la subida a la Sierra que se toma directamente al sur de Mimbres (no la que está al Norte de Mimbres)
63	E. jamesdixoni sp. nov.	CIG 314	MZFC 33014	E. jamesdixoni sp. nov. MG857034	MG857034	20.29078	-103.22113	Mexico	Jalisco	Riberas del Pilar, Chapala
64	E. jamesdixoni sp. nov.	OFV 325	MZFC 4789	E. jamesdixoni sp. nov. OFV 325	OQ145210	21.24	-103.16	Mexico	Zacatecas	2 km S Moyahua
	E. jamesdixoni sp. nov.	CIG 649	MZFC 33211	E. jamesdixoni sp. nov. MT872469	MT872469	21.32	-104.59	Mexico	Nayarit	Santa María del Oro
	E. jamesdixoni sp. nov.	TJD 894	IBH 34849	E. jamesdixoni sp. nov. TJD 894	OQ145211	23.50397	-105.83674	Mexico	Sinaloa	carretera Concordia a Durango, 7.7 miles west of El Palmito
	E. jamesdixoni sp. nov.	TJD 896	IBH 34851	E. jamesdixoni sp. nov. TJD 896	OQ145212	23.5042	-105.83701	Mexico	Sinaloa	carretera Concordia a Durango, 7.7 miles west of El Palmito
96	E. maculabialis	CIG 941	MZFC 33316	E. maculabialis MT872463	MT872463	17.41545	-100.19955	Mexico	Guerrero	River at 1320 m, between El Paraíso and Nueva Dehli, Atoyac-Puerto del Gallo Rd.
97	E. maculabialis	JAC 22216	UTA A-63153	E. maculabialis JAC 22216	OQ145214	17.46678	-100.19835	Mexico	Guerrero	Carretera Nueva Delhi-La Guitarra
98	E. maculabialis	JAC 25643	UTA A-62091	E. maculabialis JAC 25643	OQ311392	17.41134	-100.19542	Mexico	Guerrero	Carretera El Paraiso-Nueva Delhi
99	E. maculabialis	JAC 25644	UTA A-64131	E. maculabialis JAC 25644	OQ311393	17.41134	-100.19542	Mexico	Guerrero	Carretera El Paraiso-Nueva Delhi
100	E. maculabialis	CIG 921	MZFC 33312	E. maculabialis MT872460	MT872460	17.46724	-100.19161	Mexico	Guerrero	7.1 mi SW of Puerto del Gallo, also 6.5 mi NE of Nueva Dehli, Atoyac
105	E. maculabialis	CIG 946	MZFC 33318	E. maculabialis MT872464	MT872464	17.51317	-99.96408	Mexico	Guerrero	Yerba Santa, on Puerto del Gallo - Carrizal de Bravo Rd.
106	E. maculabialis	CIG 949	MZFC 33321	E. maculabialis MT872466	MT872466	17.52531	-99.93984	Mexico	Guerrero	N of Yerba Santa, Puerto del Gallo - Carrizal de Bravo Rd.
	E. maculabialis	CIG 923	MZFC 33314	E. maculabialis MT872461	MT872461	17.46724	-100.19161	Mexico	Guerrero	7.1 mi SW of Puerto del Gallo, also 6.5 mi NE of Nueva Dehli, Atoyac
	E. maculabialis	CIG 940	MZFC 33315	E. maculabialis MT872462	MT872462	17.41545	-100.19955	Mexico	Guerrero	River at 1320 m, between El Paraíso and Nueva Dehli, Atoyac-Puerto del Gallo Rd.
	E. maculabialis	CIG 947	MZFC 10611	E. maculabialis MT872465	MT872465	17.51317	-99.96408	Mexico	Guerrero	Yerba Santa, on Puerto del Gallo - Carrizal de Bravo Rd.
	E. maculabialis	JAC 25645	UTA A-64130	E. maculabialis JAC 25645	OQ408148	17.41134	-100.19542	Mexico	Guerrero	Carretera El Paraíso-Nueva Delhi
	E. maculabialis	JAC 25646		E. maculabialis JAC 25646	OQ408147	17.41134	-100.19542	Mexico	Guerrero	Carretera El Paraíso-Nueva Delhi
36	E. manantlanensis	JRV 144	MZFC 27476	E. manantlanensis MG857009	MG857009	19.43469	-103.95952	Mexico	Colima	Sierra de Manantlán, road to El Terrero
37	E. manantlanensis	CIG 896	MZFC 33296	E. manantlanensis MZ203194	MZ203194	19.44147	-103.9584	Mexico	Colima	El Terrero Rd., 13 km N of highway
38	E. manantlanensis	CIG 895	MZFC 33295	E. manantlanensis MG857008	MG857008	19.44147	-103.95839	Mexico	Colima	El Terrero Rd., 13 km N of highway
	E. manantlanensis	CIG 893	MZFC 33293	E. manantlanensis MG857007	MG857007	19.44147	-103.95837	Mexico	Colima	El Terrero Rd., 13 km N of highway
	E. manantlanensis	GP 2403	IBH 32722	E. manantlanensis MZ203193	MZ203193	19.4354	-103.95997	Mexico	Colima	Minatitl an, on the road to El Terrero
122	E. maurus	CIG 388	MZFC 33080	E. maurus MG857010	MG857010	19.01607	-99.26525	Mexico	Morelos	Huitzilac
123	E. maurus	TJD 868	IBH 34838	E. maurus TJD 868	OQ145215	19.00585	-99.26317	Mexico	Morelos	camino a Huertas de San Pedro, 2.4 km S of Huitzilac
	E. maurus	CIG 380	MZFC 33072	E. maurus MG857011	MG857011	18.98306	-99.32218	Mexico	México	Just W of Mexicapa, on Cuernavaca-Ocuilan Rd.
	E. maurus	CIG 382	MZFC 33074	E. maurus MT872478	MT872478	18.98306	-99.32218	Mexico	México	Just W of Mexicapa, on Cuernavaca-Ocuilan Rd.
	E. maurus	CIG 385	MZFC 33077	E. maurus MT872479	MT872479	19.01607	-99.26525	Mexico	Morelos	Huitzilac
	E. maurus	CIG 387	MZFC 33079	E. maurus MT872480	MT872480	19.01607	-99.26525	Mexico	Morelos	Huitzilac
	E. maurus	GP 2434	IBH 32729	E. maurus MZ203205	MZ203205	19.0406	-99.25501	Mexico	Morelos	Tres Mar ıas Hwy., on the road to Coajomulco
	E. maurus	TJD 869	IBH 34839	E. maurus TJD 869	OQ145216	19.00585	-99.26317	Mexico	Morelos	camino a Huertas de San Pedro, 2.4 km S of Huitzilac
	E. maurus	TJD 870	IBH 34840	E. maurus TJD 870	OQ145217	19.00585	-99.26317	Mexico	Morelos	camino a Huertas de San Pedro, 2.4 km S of Huitzilac
	E. maurus	TJD 871	IBH 34841	E. maurus TJD 871	OQ145218	19.00585	-99.26317	Mexico	Morelos	camino a Huertas de San Pedro, 2.4 km S of Huitzilac
	E. maurus	TJD 872	IBH 34842	E. maurus TJD 872	OQ145219	19.00585	-99.26317	Mexico	Morelos	camino a Huertas de San Pedro, 2.4 km S of Huitzilac
	E. maurus	TJD 873	IBH 34843	E. maurus TJD 873	OQ145220	19.00585	-99.26317	Mexico	Morelos	camino a Huertas de San Pedro, 2.4 km S of Huitzilac
	E. maurus	TJD 874	IBH 34844	E. maurus TJD 874	OQ145221	19.00585	-99.26317	Mexico	Morelos	camino a Huertas de San Pedro, 2.4 km S of Huitzilac
6	E. modestus	GP 2389	IBH 32727	E. modestus MZ203200	MZ203200	20.51186	-105.31464	Mexico	Jalisco	Puerto Vallarta, Boca de Tomatlán
22	E. modestus	CIG 571	MZFC 33184	E. modestus MG857014	MG857014	19.28909	-104.78939	Mexico	Jalisco	La Manzanilla
23	E. modestus	CIG 497	MZFC 33148	E. modestus MG857020	MG857020	20.23072	-104.7758	Mexico	Jalisco	Bosque de Maple turnoff on Talpa de Allende-Tomatlán Hwy.
31	E. modestus	JAC 23946	UTA A-59442	E. modestus JAC 23946	OQ145222	19.68852	-104.39542	Mexico	Jalisco	Sierra de Manantlán, Puerto Los Mazos, Rancho Los Mojos
32	E. modestus	CIG 505	MZFC 33150	E. modestus MG857015	MG857015	19.65595	-104.32866	Mexico	Jalisco	At 1400 m mark of the road between Aguacapán and Est. Las Joyas, Sierra de Manantlán
33	E. modestus	CIG 508	MZFC 33153	E. modestus MG857016	MG857016	19.65595	-104.32866	Mexico	Jalisco	At 1400 m mark of the road between Aguacapán and Est. Las Joyas, Sierra de Manantlán
34	E. modestus	CIG 891	MZFC 33291	E. modestus MG857012	MG857012	19.26999	-104.07494	Mexico	Colima	Arrayanal
41	E. modestus	CIG 857	MZFC 33270	E. modestus MG857021	MG857021	18.9968	-103.90317	Mexico	Colima	W of Caleras
	E. modestus	CIG 493	MZFC 33144	E. modestus MG857019	MG857019	20.23072	-104.7758	Mexico	Jalisco	Bosque de Maple turnoff on Talpa de Allende-Tomatlán Hwy.
	E. modestus	CIG 509	MZFC 33154	E. modestus MG857017	MG857017	19.65595	-104.32866	Mexico	Jalisco	At 1400 m mark of the road between Aguacapán and Est. Las Joyas, Sierra de Manantlán
	E. modestus	CIG 570	MZFC 33183	E. modestus MG857018	MG857018	19.70045	-104.39211	Mexico	Jalisco	Puerto Los Mazos, on Hwy. 80., Sierra de Manantlán
151	E. nebulosus	UOGV 3320	MZFZ 4450	E. nebulosus MZ203213	MZ203213	16.71583	-93.54675	Mexico	Chiapas	Jiquipilas, Subteniente Pedro Sanchéz
152	E. nebulosus	CIG 1241	MZFC 33366	E. nebulosus MT872432	MT872432	16.92208	-93.45307	Mexico	Chiapas	Ocozocoatla
154	E. nebulosus	GP 2268	IBH 32741	E. nebulosus MZ203223	MZ203223	15.41861	-92.57933	Mexico	Chiapas	Escuintla, on the road to Nueva Francia-Peñuela
155	E. nebulosus	GP 2269	IBH 32742	E. nebulosus MZ203224	MZ203224	15.41861	-92.57933	Mexico	Chiapas	Escuintla, on the road to Nueva Francia-Peñuela
158	E. nebulosus	CIG 1237	MZFC 33362	E. nebulosus MT872429	MT872429	16.12	-92.05	Mexico	Chiapas	La Trinitaria
	E. nebulosus	CIG 1236	MZFC 33361	E. nebulosus MT872428	MT872428	16.12	-92.05	Mexico	Chiapas	La Trinitaria
	E. nebulosus	CIG 1238	MZFC 33363	E. nebulosus MT872430	MT872430	16.12	-92.05	Mexico	Chiapas	La Trinitaria
	E. nebulosus	CIG 1240	MZFC 33365	E. nebulosus MT872431	MT872431	16.92208	-93.45306	Mexico	Chiapas	Ocozocoatla
	E. nebulosus	GP 2259	IBH 32734	E. nebulosus MZ203216	MZ203216	16.43622	-94.21944	Mexico	Oaxaca	San Pedro Tapanatepec, Exhacienda Santa Efigenia
	E. nebulosus	GP 2260	IBH 32735	E. nebulosus MZ203217	MZ203217	16.43622	-94.21944	Mexico	Oaxaca	San Pedro Tapanatepec, Exhacienda Santa Efigenia
	E. nebulosus	GP 2262	IBH 32736	E. nebulosus MZ203218	MZ203218	16.43622	-94.21944	Mexico	Oaxaca	San Pedro Tapanatepec, Exhacienda Santa Efigenia
	E. nebulosus	GP 2263	IBH 32737	E. nebulosus MZ203219	MZ203219	16.87754	-93.45535	Mexico	Chiapas	Ocozocoautla de Espinosa, Parque Educativo Laguna Belgica
	E. nebulosus	GP 2264	IBH 32738	E. nebulosus MZ203220	MZ203220	16.87754	-93.45535	Mexico	Chiapas	Ocozocoautla de Espinosa, Parque Educativo Laguna Belgica
	E. nebulosus	GP 2266	IBH 32739	E. nebulosus MZ203221	MZ203221	15.41861	-92.57933	Mexico	Chiapas	Escuintla, on the road to Nueva Francia-Peñuela
	E. nebulosus	GP 2267	IBH 32740	E. nebulosus MZ203222	MZ203222	15.41861	-92.57933	Mexico	Chiapas	Escuintla, on the road to Nueva Francia-Peñuela
	E. nebulosus	GP 2271	IBH 32743	E. nebulosus MZ203225	MZ203225	15.41861	-92.57933	Mexico	Chiapas	Escuintla, on the road to Nueva Francia-Peñuela
	E. nebulosus	GP 2272	IBH 32744	E. nebulosus MZ203226	MZ203226	15.41861	-92.57933	Mexico	Chiapas	Escuintla, on the road to Nueva Francia-Peñuela
	E. nebulosus	UOGV 3338	MZFZ 4451	E. nebulosus MZ203214	MZ203214	16.91704	-93.71638	Mexico	Chiapas	Ocozocoautla, Camino El Aguacate, Gral. Cárdenas
	E. nebulosus	UOGV 3339	MZFZ 4452	E. nebulosus MZ203215	MZ203215	16.91465	-93.06483	Mexico	Chiapas	Chicoasén, Cerca de Presa Chicoasén
57	E. nietoi	CIG 974	MZFC 33336	E. nietoi MG857026	MG857026	18.66666	-99.51917	Mexico	Michoacán	between Aquila and western Villa Victoria turnoff, on Aquila - Coalcomán Rd.
58	E. nietoi	CIG 975	MZFC 33337	E. nietoi MG857027	MG857027	18.66666	-103.42814	Mexico	Michoacán	between Aquila and western Villa Victoria turnoff, on Aquila - Coalcomán Rd.
59	E. nietoi	GP 2409	IBH 32724	E. nietoi MZ203196	MZ203196	18.66691	-103.42725	Mexico	Michoacán	Chinicuila, on the road to La Nuez
61	E. nietoi	CIG 984	MZFC 33343	E. nietoi MG857028	MG857028	18.70534	-103.30393	Mexico	Michoacán	cave near E Villa Victoria turnoff, on Aquila - Coalcomán Rd.
	E. nietoi	CIG 346	MZFC 33042	E. nietoi MG857022	MG857022	18.69892	-103.4115	Mexico	Michoacán	3.3 km W of western Villa Victoria turnoff on Aquila-Coalcomán Rd.
	E. nietoi	CIG 348	MZFC 33044	E. nietoi MG857023	MG857023	18.69892	-103.4115	Mexico	Michoacán	3.3 km W of western Villa Victoria turnoff on Aquila-Coalcomán Rd.
	E. nietoi	CIG 355	MZFC 33050	E. nietoi MG857024	MG857024	18.70241	-103.39738	Mexico	Michoacán	0.9 km W of western Villa Victoria turnoff on Aquila-Coalcomán Rd.
	E. nietoi	CIG 357	MZFC 33052	E. nietoi MG857025	MG857025	18.70241	-103.39738	Mexico	Michoacán	0.9 km W of western Villa Victoria turnoff on Aquila-Coalcomán Rd.
104	E. nitidus	GSB 97		E. nitidus GSB 97	OQ145226	18.84606	-99.98644	Mexico	México	La Unión
108	E. nitidus	JAC 22178	UTA A-56515	E. nitidus JAC 22178	OQ145228	17.6595	-99.70217	Mexico	Guerrero	Area above Chichihualco
114	E. nitidus	TJD 775	IBH 34788	E. nitidus TJD 775	OQ145235	17.43976	-99.50163	Mexico	Guerrero	6.6 km (by road) W of Mazatlán on road to Tejocote
125	E. nitidus	CIG 389	MZFC 33081	E. nitidus MG857029	MG857029	18.56484	-99.18846	Mexico	Morelos	Higuerón
126	E. nitidus	UOGV 630	MZFC 23342	E. nitidus UOGV 630	OQ145256	18.6	-99.1	Mexico	Morelos	Sierra de Huautla
128	E. nitidus	CIG 439	MZFC 33106	E. nitidus MT872474	MT872474	17.05901	-98.75804	Mexico	Guerrero	between Tilapa de Guerrero and Puerto El Guayabo, San Luis Acatlán-Tlapa de Comonfort Hwy.
133	E. nitidus	TJD 821	IBH 34812	E. nitidus TJD 821	OQ145240	18.60429	-98.48672	Mexico	Puebla	Hotel Atlanta, Izucar de Matamoros
136	E. nitidus	CIG 715	MZFC 33248	E. nitidus MG857030	MG857030	17.02	-97.77	Mexico	Oaxaca	Santa María Yucuhiti
138	E. nitidus	TJD 1246	MZFZ 4487	E. nitidus TJD 1246	OQ145247	17.51827	-97.51561	Mexico	Oaxaca	Guadalupe Tixa
146	E. nitidus	TJD 1286	MZFZ 4501	E. nitidus TJD 1286	OQ145254	16.92263	-96.3468	Mexico	Oaxaca	San Pablo Villa de Mitla
148	E. nitidus	JRM 4078	MZFC 10611	E. nitidus JRM 4078	OQ145234	16.66845	-94.19258	Mexico	Oaxaca	Al W del Cerro Baul, 8.8 km S Colonia Rodulfo Figueroa
	E. nitidus	ANMO 2075	MZFC 23404	E. nitidus ANMO 2075	OQ145223	18.67631	-99.53456	Mexico	Morelos	Carretera Cacahuamilpa-Ixtapan de La Sal
	E. nitidus	CDR 142		E. nitidus CDR 142	OQ145224			Mexico
	E. nitidus	CIG 336	MZFC 33034	E. nitidus MG857032	MG857032	17.97886	-101.21077	Mexico	Guerrero	1.5 km N of pass between Vallecitos and Los Fogones, Hwy. 134 (Zihuatanejo-Altamirano Hwy.)
	E. nitidus	CIG 412	MZFC 33096	E. nitidus MG857031	MG857031	17.55479	-99.62433	Mexico	Guerrero	At large pond between Amojileca and Omiltemi
	E. nitidus	EPR 1147	MZFC 11548	E. nitidus EPR 1147	OQ145225	17.69972	-99.51917	Mexico	Guerrero	2.5 km E El Platanal
	E. nitidus	GP 2344	IBH 32730	E. nitidus MZ203206	MZ203206	18.58539	-98.51341	Mexico	Puebla	Casa Blanca, 4 km SW of Iz ucar de Matamoros
	E. nitidus	GSB 100		E. nitidus GSB 100	OQ145227	18.84606	-99.98644	Mexico	México	La Unión
	E. nitidus	JAC 21606	UTA A-54771	E. nitidus DQ283316	DQ283316	17.71522	-96.88072	Mexico	Oaxaca	Cuicatlan, Tutepetongo; 1619 m
	E. nitidus	JAC 22417	UTA A-56582	E. nitidus JAC 22417	OQ145229	18.309	-97.009	Mexico	Puebla	Sierra Negra
	E. nitidus	JAC 25815	UTA A-61584	E. nitidus JAC 25815	OQ145230	17.21826	-98.64165	Mexico	Guerrero	Rd to Tlapa from Marquelia
	E. nitidus	JAC 30901	MZFC, uncataloged	E. nitidus JAC 30901	OQ145231	17.6272	-97.33102	Mexico	Oaxaca	Hwy. 135, ~ km. 157, ca. 4 km. N San Bartolo Soyaltepec
	E. nitidus	JCSG 327	MZFZ, uncataloged	E. nitidus JCSG 327	OQ145232	28.18	-43.99	Mexico	Veracruz	Municipio Nogales, Palo Verde
	E. nitidus	JCSG 328	MZFZ, uncataloged	E. nitidus JCSG 328	OQ145233	28.18	-43.99	Mexico	Veracruz	Municipio Nogales, Palo Verde
	E. nitidus	TJD 1245	MZFZ 4486	E. nitidus TJD 1245	OQ145246	17.51827	-97.51561	Mexico	Oaxaca	Guadalupe Tixa
	E. nitidus	TJD 1247	MZFZ 4488	E. nitidus TJD 1247	OQ145248	17.51827	-97.51561	Mexico	Oaxaca	Guadalupe Tixa
	E. nitidus	TJD 1248	MZFZ 4489	E. nitidus TJD 1248	OQ145249	17.51827	-97.51561	Mexico	Oaxaca	Guadalupe Tixa
	E. nitidus	TJD 1249	MZFZ 4490	E. nitidus TJD 1249	OQ145250	17.51827	-97.51561	Mexico	Oaxaca	Guadalupe Tixa
	E. nitidus	TJD 1250	MZFZ 4491	E. nitidus TJD 1250	OQ145251	17.51827	-97.51561	Mexico	Oaxaca	Guadalupe Tixa
	E. nitidus	TJD 1251	MZFZ 4492	E. nitidus TJD 1251	OQ145252	17.52876	-97.51894	Mexico	Oaxaca	Guadalupe Tixa
	E. nitidus	TJD 1252	MZFZ 4493	E. nitidus TJD 1252	OQ145253	17.52876	-97.51894	Mexico	Oaxaca	Guadalupe Tixa
	E. nitidus	TJD 776	IBH 34789	E. nitidus TJD 776	OQ145236	17.43976	-99.50163	Mexico	Guerrero	6.6 km (by road) W of Mazatlán on road to Tejocote
	E. nitidus	TJD 818	IBH 34809	E. nitidus TJD 818	OQ145237	18.60429	-98.48672	Mexico	Puebla	Hotel Atlanta, Izucar de Matamoros
	E. nitidus	TJD 819	IBH 34810	E. nitidus TJD 819	OQ145238	18.60429	-98.48672	Mexico	Puebla	Hotel Atlanta, Izucar de Matamoros
	E. nitidus	TJD 820	IBH 34811	E. nitidus TJD 820	OQ145239	18.60429	-98.48672	Mexico	Puebla	Hotel Atlanta, Izucar de Matamoros
	E. nitidus	TJD 848	IBH 34828	E. nitidus TJD 848	OQ145241	17.4402	-99.49931	Mexico	Guerrero	~5.8 km (by road) W of Mazatlán (measured from MEX 95 libre) on road to Tejocote
	E. nitidus	TJD 849	IBH 34829	E. nitidus TJD 849	OQ145242	17.43763	-99.50196	Mexico	Guerrero	~6.3 km (by road) W of Mazatlán (measured from MEX 95 libre) on road to Tejocote
	E. nitidus	TJD 850	IBH 34830	E. nitidus TJD 850	OQ145243	17.43703	-99.50221	Mexico	Guerrero	~6.4 km (by road) W of Mazatlán (measured from MEX 95 libre) on road to Tejocote
	E. nitidus	TJD 851	IBH 34831	E. nitidus TJD 851	OQ145244	17.4368	-99.50223	Mexico	Guerrero	~6.4 km (by road) W of Mazatlán (measured from MEX 95 libre) on road to Tejocote
	E. nitidus	TJD 852	IBH 34832	E. nitidus TJD 852	OQ145245	17.43641	-99.50226	Mexico	Guerrero	~6.5 km (by road) W of Mazatlán (measured from MEX 95 libre) on road to Tejocote
	E. nitidus	UOGV 161	MZFC, uncataloged	E. nitidus UOGV 161	OQ145255	17.88764	-96.90122	Mexico	Oaxaca	San Lorenzo, Pápalo
	E. nitidus	UOGV 2938	MZFZ 4507	E. nitidus UOGV 2938	OQ145257	17.65273	-97.95391	Mexico	Oaxaca	Boqueron de Tonala
	E. nitidus	UOGV 3119	MZFZ 4511	E. nitidus UOGV 3119	OQ145258	17.63744	-97.93729	Mexico	Oaxaca	La cañada
	E. nitidus	UOGV 3415	MZFZ 4376	E. nitidus UOGV 3415	OQ145259	17.51522	-98.2052	Mexico	Oaxaca	Cerro Yucutachi
	E. nitidus	UOGV 3416	MZFZ 4377	E. nitidus UOGV 3416	OQ145260	17.51522	-98.2052	Mexico	Oaxaca	Cerro Yucutachi
	E. nitidus		AMCC 118239	E. nitidus EU186712	EU186712	18.9	-97.3	Mexico	Puebla	Sierra Negra
43	E. orarius	CIG 459	MZFC 33112	E. orarius MZ203207	MZ203207	19.0264	-103.79034	Mexico	Colima	Junction of Ixtlahuacán Rd. With Hwy. 54 frontage rd.
47	E. orarius	JAC 24020	UTA A-59508	E. orarius JAC 24020	OQ145261	18.68042	-103.69055	Mexico	Michoacán	Mex 200
53	E. orarius	CIG 341	MZFC 33037	E. orarius MG857041	MG857041	18.58227	-103.5222	Mexico	Michoacán	0.6 km W of bridge on S entrance to Aquila, on La Placita-Aquila Rd.
56	E. orarius	JAC 25526	UTA A-62090	E. orarius JAC 25526	OQ311394	18.32751	0	Mexico	Michoacán	Carretera Playa Azul-Manzanillo
60	E. orarius	JAC 25564	UTA A-61576	E. orarius JAC 25564	OQ311395	18.26944	-103.35291	Mexico	Michoacán	Carretera Playa Azul-Manzanillo
77	E. orarius	JAC 25339	UTA A-62399	E. orarius JAC 25339	OQ145262	17.98325	-102.21369	Mexico	Michoacán	Lázaro Cárdenas Motel
	E. orarius	CIG 458	MZFC 33111	E. orarius MT872477	MT872477	19.0264	-103.79034	Mexico	Colima	Junction of Ixtlahuacán Rd. With Hwy. 54 frontage rd.
	E. orarius	CIG 460	MZFC 33113	E. orarius MG857042	MG857042	19.0264	-103.79034	Mexico	Colima	Junction of Ixtlahuacán Rd. With Hwy. 54 frontage rd.
	E. orarius	JAC 25341	UTA A-62400	E. orarius JAC 25341	OQ408146	17.98325	-102.21369	Mexico	Michoacán	Lázaro Cárdenas Motel
	E. orarius	JAC 25342	UTA A-62401	E. orarius JAC 25342	OQ145263	17.98325	-102.21369	Mexico	Michoacán	Lázaro Cárdenas Motel
	E. orarius	JAC 25343	UTA A-62402	E. orarius JAC 25343	OQ311392	17.98325	-102.21369	Mexico	Michoacán	Lázaro Cárdenas Motel
	E. orarius	JAC 25344	UTA A-62403	E. orarius JAC 25344	OQ311393	17.98325	-102.21369	Mexico	Michoacán	Lázaro Cárdenas Motel
	E. orarius	JAC 25392	UTA A-61572	E. orarius JAC 25392	OQ145264	18.44512	-102.53974	Mexico	Michoacán	Carretera Playitas-Tumbiscatio de Ruiz
	E. orarius	JAC 25415	UTA A-61574	E. orarius JAC 25415	OQ145265	18.45689	-102.52996	Mexico	Michoacán	Rd Playitas from Tumbiscatio
	E. orarius	JAC 25563	UTA A-61575	E. orarius JAC 25563	OQ145266	18.26944	-103.35291	Mexico	Michoacán	Carretera Playa Azul-Manzanillo
2	E. pallidus	CIG 586	MZFC 33188	E. pallidus MG857043	MG857043	23.4004	-105.91569	Mexico	Sinaloa	Copala (Hwy. 40)
3	E. pallidus	GP 2374	IBH 32726	E. pallidus MZ203199	MZ203199	23.42667	-105.87889	Mexico	Sinaloa	On the road to Concordia
7	E. pallidus	TJD 886	IBH 34847	E. pallidus TJD 886	OQ145273	21.57354	-105.23134	Mexico	Nayarit	road to San Blas from MEX 15; vicinity of Singayta
8	E. pallidus	CIG 652	MZFC 33214	E. pallidus MG857050	MG857050	21.46	-105.03	Mexico	Nayarit	El Cuarenteño
9	E. pallidus	TJD 954	IBH 34858	E. pallidus TJD 954	OQ145276	21.564	-104.93208	Mexico	Nayarit	El Rincon, just north of Tepic on MX 15 libre to Mazatlán
10	E. pallidus	TJD 955	IBH 34859	E. pallidus TJD 955	OQ145277	21.564	-104.93208	Mexico	Nayarit	El Rincon, just north of Tepic on MX 15 libre to Mazatlán
11	E. pallidus	JAC 23706	UTA A-59440	E. pallidus JAC 23706	OQ145268	20.77	-104.91	Mexico	Jalisco	La Estancia
13	E. pallidus	JAC 23705	UTA A-61911	E. pallidus JAC 23705	OQ311396	20.74599	-104.89349	Mexico	Jalisco	Carretera La Estancia-Mascota
21	E. pallidus	CIG 858	MZFC 33271	E. pallidus MG857044	MG857044	20.6371	-104.86011	Mexico	Jalisco	W of Mascota
29	E. pallidus	CIG 689	MZFC 33244	E. pallidus MG857051	MG857051	21.28	-104.68	Mexico	Nayarit	Tepetiltic
	E. pallidus	CIG 588	MZFC 33189	E. pallidus MG857047	MG857047	21.53	-105.11	Mexico	Nayarit	Mecatán
	E. pallidus	CIG 650	MZFC 33212	E. pallidus MG857048	MG857048	21.46	-105.03	Mexico	Nayarit	El Cuarenteño
	E. pallidus	CIG 651	MZFC 33213	E. pallidus MG857049	MG857049	21.46	-105.03	Mexico	Nayarit	El Cuarenteño
	E. pallidus	CIG 690	MZFC 33245	E. pallidus MG857052	MG857052	21.28	-104.68	Mexico	Nayarit	Tepetiltic
	E. pallidus	CIG 859	MZFC 33272	E. pallidus MG857045	MG857045	20.6371	-104.86011	Mexico	Jalisco	W of Mascota
	E. pallidus	CIG 995	MZFC 33018	E. pallidus MG857053	MG857053	21.5195	-104.97122	Mexico	Nayarit	Cuarenteño turnoff on Nayarit Hwy. 76 between Tepic and San Bla
	E. pallidus	ISZ 661	MZFC 25133	E. pallidus ISZ 661	OQ145267	21.21839	-104.93933	Mexico	Nayarit	Aproximadamente 4.5 km WSW Compostela
	E. pallidus	JAC 25878	UTA, uncataloged	E. pallidus JAC 25878	OQ145269			Mexico	Nayarit	Hwy 15 to Mazatlan from Tepic
	E. pallidus	JAC 25879	UTA, uncataloged	E. pallidus JAC 25879	OQ145270			Mexico	Nayarit	Hwy 15 to Mazatlan from Tepic
	E. pallidus	TJD 884	IBH 34845	E. pallidus TJD 884	OQ145271	21.5736	-105.23166	Mexico	Nayarit	road to San Blas from MEX 15; vicinity of Singayta
	E. pallidus	TJD 885	IBH 34846	E. pallidus TJD 885	OQ145272	21.57357	-105.23139	Mexico	Nayarit	road to San Blas from MEX 15; vicinity of Singayta
	E. pallidus	TJD 887	IBH 34848	E. pallidus TJD 887	OQ145274	21.57356	-105.23138	Mexico	Nayarit	road to San Blas from MEX 15; vicinity of Singayta
	E. pallidus	TJD 953	IBH 34857	E. pallidus TJD 953	OQ145275	21.564	-104.93208	Mexico	Nayarit	El Rincon, just north of Tepic on MX 15 libre to Mazatlán
73	E. petersi	JAC 24060	UTA A-59389	E. petersi JAC 24060	OQ145281	19.20857	-102.656	Mexico	Michoacán	Carretera Tepalcatepec-Apatzingan
78	E. petersi	UOGV 1547	MZFC 24151	E. petersi UOGV 1547	OQ145285	18.92739	-102.11994	Mexico	Michoacán	Carretera Nueva Italia-Arteaga
84	E. petersi	JAC 25265	UTA A-61562	E. petersi JAC 25265	OQ311397	17.9787	-101.21436	Mexico	Guerrero	Puerto del Bálsamo
85	E. petersi	JAC 25266	UTA A-61563	E. petersi JAC 25266	OQ311398	17.9787	-101.21436	Mexico	Guerrero	Puerto del Bálsamo
86	E. petersi	CIG 337	MZFC 33035	E. petersi MT872473	MT872473	17.97886	-101.21077	Mexico	Guerrero	1.5 km N of pass between Vallecitos and Los Fogones, Hwy. 134 (Zihuatanejo-Altamirano Hwy.)
91	E. petersi	ISZ 595	MZFC 25097	E. petersi ISZ 595	OQ145279	19.58536	-100.93047	Mexico	Michoacán	El Llano de los Vieyra, 1 km W Tzitzio
92	E. petersi	ISZ 596	MZFC 25098	E. petersi ISZ 596	OQ145280	19.58536	-100.93047	Mexico	Michoacán	El Llano de los Vieyra, 1 km W Tzitzio
102	E. petersi	UOGV 2980	MZFZ 4508	E. petersi UOGV 2980	OQ145286	19.01006	-100.10216	Mexico	México	Tejupilco, El Tule
107	E. petersi	TJD 799	IBH 34795	E. petersi TJD 799	OQ145284	18.45624	-99.923	Mexico	Guerrero	Afueras de la Cueva de Los Siete Salones, La Yerbabuena
	E. petersi	ISZ 594	MZFC 25096	E. petersi ISZ 594	OQ145278	19.58536	-100.93047	Mexico	Michoacán	El Llano de los Vieyra, 1 km W Tzitzio
	E. petersi	JAC 25219	UTA A-61561	E. petersi JAC 25219	OQ408145	17.99478	-101.19542	Mexico	Guerrero	El Cundán, Puente El Balcón, carretera Puerto del Bálsamo-El Cundancito
	E. petersi	JAC 25299	UTA A-61568	E. petersi JAC 25299	OQ408144	18.04381	-101.30108	Mexico	Guerrero	Rd W to Zihuaquio from Vallecitos
	E. petersi	TJD 797	IBH 34793	E. petersi TJD 797	OQ145282	18.45624	-99.923	Mexico	Guerrero	Afueras de la Cueva de Los Siete Salones, La Yerbabuena
	E. petersi	TJD 798	IBH 34794	E. petersi TJD 798	OQ145283	18.45624	-99.923	Mexico	Guerrero	Afueras de la Cueva de Los Siete Salones, La Yerbabuena
	E. petersi	UOGV 2981	MZFZ 4509	E. petersi UOGV 2981	OQ145287	19.01006	-100.10216	Mexico	México	Tejupilco, El Tule
	E. petersi	UOGV 3009	MZFZ 4510	E. petersi UOGV 3009	OQ145288	19.01006	-100.10216	Mexico	México	Tejupilco, El Tule
115	E. pipilans	CIG 396	MZFC 33086	E. pipilans MG857054	MG857054	17.38004	-99.47899	Mexico	Guerrero	6.1 km (3.8 mi) N of Acahuizotla turnoff, Hwy. 95 libre
118	E. pipilans	TJD 843	IBH 34826	E. pipilans TJD 843	OQ145298	17.34995	-99.47253	Mexico	Guerrero	~1.8 km (by road) east of MX 95 libre on road to Acahuizotla
129	E. pipilans	CIG 440	MZFC 33107	E. pipilans MT872475	MT872475	17.05901	-98.75804	Mexico	Guerrero	between Tilapa de Guerrero and Puerto El Guayabo, San Luis Acatlán-Tlapa de Comonfort Hwy.
139	E. pipilans	JAC 24283	UTA A-64104	E. pipilans JAC 24283	OQ311399	16.07551	-97.41297	Mexico	Oaxaca	Carretera entre Río Grande y San Marcos Zacatepec
143	E. pipilans	JAC 25809	UTA A-62404	E. pipilans JAC 25809	OQ311400	15.85945	-96.46526	Mexico	Oaxaca	Rd 175 from Pochutla to Oaxaca
144	E. pipilans	JAC 21257	MZFC 16097	E. pipilans JAC 21257	OQ145289	15.7804	-96.46343	Mexico	Oaxaca	Sierra Madre del Sur, carretera Pochutla- San Jose Pacifico
145	E. pipilans	JAC 31540	MZFC, uncataloged	E. pipilans JAC 31540	OQ145294	17.14531	-96.4108	Mexico	Oaxaca	San Isidro Llano Grande
	E. pipilans	CIG 398	MZFC 33088	E. pipilans MG857055	MG857055	17.3289	-99.46985	Mexico	Guerrero	Agua del Obispo
	E. pipilans	GCG 891		E. pipilans MZ203209	MZ203209			Mexico
	E. pipilans	JAC 25810	UTA A-62405	E. pipilans JAC 25810	OQ145290	15.85945	-96.46526	Mexico	Oaxaca	Rd 175 from Pochutla to Oaxaca
	E. pipilans	JAC 25811	UTA A-62406	E. pipilans JAC 25811	OQ145291	15.85945	-96.46526	Mexico	Oaxaca	Rd 175 from Pochutla to Oaxaca
	E. pipilans	JAC 31492	MZFC, uncataloged	E. pipilans JAC 31492	OQ145292	15.93157	-96.48626	Mexico	Oaxaca	Candelaria Loxicha
	E. pipilans	JAC 31539	MZFC, uncataloged	E. pipilans JAC 31539	OQ145293	17.14531	-96.4108	Mexico	Oaxaca	San Isidro Llano Grande
	E. pipilans	RPA 344	MZFC 34813	E. pipilans MZ203210	MZ203210	16.87443	-99.88025	Mexico	Guerrero	Mpo. Acapulco, Col. Alianza Popular
	E. pipilans	TJD 839	IBH 34822	E. pipilans TJD 839	OQ145295	17.35303	-99.47323	Mexico	Guerrero	~1.8 km (by road) east of MX 95 libre on road to Acahuizotla
	E. pipilans	TJD 841	IBH 34824	E. pipilans TJD 841	OQ145296	17.35317	-99.47314	Mexico	Guerrero	~1.8 km (by road) east of MX 95 libre on road to Acahuizotla
	E. pipilans	TJD 842	IBH 34825	E. pipilans TJD 842	OQ145297	17.34995	-99.47253	Mexico	Guerrero	~1.8 km (by road) east of MX 95 libre on road to Acahuizotla
	E. pipilans	TJD 844	IBH 34827	E. pipilans TJD 844	OQ145299	17.34995	-99.47225	Mexico	Guerrero	~1.8 km (by road) east of MX 95 libre on road to Acahuizotla
147	E. rubrimaculatus	IDF 189	MZFC 24506	E. rubrimaculatus IDF 189	OQ145300	16.55306	-94.26803	Mexico	Oaxaca	Cañada del Río Bejucal, camino a El Mamey
149	E. rubrimaculatus	IDF 212	MZFC 24515	E. rubrimaculatus IDF 212	OQ145301	16.21983	-93.70625	Mexico	Chiapas	SW Ejido Tierra y Libertad
150	E. rubrimaculatus	UOGV 944	MZFC, uncataloged	E. rubrimaculatus UOGV 944	OQ145305	16.29719	-93.58097	Mexico	Chiapas	Aprox. 1 km NE Ejido Flores Magón, por el camino
153	E. rubrimaculatus	UOGV 329	MZFC 22047	E. rubrimaculatus UOGV 329	OQ145304	16.94928	-93.38581	Mexico	Chiapas	Ocozocoautla, Col. Velasco Suárez
156	E. rubrimaculatus	CIG 755	MZFC 33250	E. rubrimaculatus MG857057	MG857057	15.22869	-92.4741	Mexico	Chiapas	below Ejido Morelos, Municipio de Huixtla
157	E. rubrimaculatus	SMR 1177	IBH 30482	E. rubrimaculatus SMR 1177	OQ145303	15.11542	-92.30231	Mexico	Chiapas	Finca Nueva Alemania, 38.3 km N (by rd) of intersection with MX200 on road from Tapachula
	E. rubrimaculatus	CIG 753	MZFC 33249	E. rubrimaculatus MG857056	MG857056	15.04422	-92.08972	Mexico	Chiapas	River below Union Juaréz
	E. rubrimaculatus	GP 2277	IBH 32732	E. rubrimaculatus MZ203211	MZ203211	15.3125	-92.43319	Mexico	Chiapas	La Esperanza, Escuintla
	E. rubrimaculatus	GP 2278	IBH 32733	E. rubrimaculatus MZ203212	MZ203212	15.3125	-92.43319	Mexico	Chiapas	La Esperanza, Escuintla
	E. rubrimaculatus	SMR 1176	IBH 30483	E. rubrimaculatus SMR 1176	OQ145302	15.11542	-92.30231	Mexico	Chiapas	Finca Nueva Alemania, 38.3 km N (by rd) of intersection with MX200 on road from Tapachula
	E. rubrimaculatus	UOGV 963	MZFC 24561	E. rubrimaculatus UOGV 963	OQ145306	16.24406	-93.68461	Mexico	Chiapas	Las Ventanas, aproximadamente 2 km N Tierra y Libertad
42	E. rufescens	CIG 472	MZFC 33123	E. rufescens MG857037	MG857037	19.85874	-103.80246	Mexico	Jalisco	Tapalpa-San Gabriel Hwy.
51	E. rufescens	JRV 184	MZFC 26908	E. rufescens MG857040	MG857040	19.5318	-103.52711	Mexico	Jalisco	Road from Atenquique to radio towers, Nevado de Colima
62	E. rufescens	CIG 551	MZFC 33172	E. rufescens MG857063	MG857063	19.47462	-103.2577	Mexico	Jalisco	Tecalitlán-Jilotlán de Dolores Rd.
65	E. rufescens	CIG 544	MZFC 33165	E. rufescens MG857039	MG857039	19.89267	-103.08371	Mexico	Jalisco	Hwy. 110 between Mazamitla and Contla
66	E. rufescens	CIG 982	MZFC 33341	E. rufescens MG857066	MG857066	18.83005	-103.02862	Mexico	Michoacán	Rancho Las Torrecillas, on Coalcomán-Dos Aguas Rd.
67	E. rufescens	JRV 85	MZFC 26887	E. rufescens MG857036	MG857036	19.71044	-102.92996	Mexico	Jalisco	Sierra de Mazamitla, Road from Valle de Juarez to Manuel M. Dieguez
69	E. rufescens	SMR 2612	IBH 32723	E. rufescens MZ203195	MZ203195	18.80275	-102.92896	Mexico	Michoacán	Aguililla, 2.3 km N (by road) of center of Dos Aguas on road to antennas
74	E. rufescens	JAC 25413	UTA A-62089	E. rufescens JAC 25413	OQ145309	18.42956	-102.56711	Mexico	Michoacán	Rd from Playitas to Microwave Towers (after logging station)
	E. rufescens	CIG 344	MZFC 33040	E. rufescens MG857067	MG857067	18.73271	-103.29368	Mexico	Michoacán	7.2 km E of eastern Villa Victoria turnoff on Aquila-Coalcomán Rd.
	E. rufescens	CIG 345	MZFC 33041	E. rufescens MG857068	MG857068	18.73271	-103.29368	Mexico	Michoacán	7.2 km E of eastern Villa Victoria turnoff on Aquila-Coalcomán Rd.
	E. rufescens	CIG 351	MZFC 33047	E. rufescens MG857058	MG857058	18.70241	-103.39738	Mexico	Michoacán	0.9 km W of western Villa Victoria turnoff on Aquila-Coalcomán Rd.
	E. rufescens	CIG 353	MZFC 33049	E. rufescens MG857059	MG857059	18.70241	-103.39738	Mexico	Michoacán	0.9 km W of western Villa Victoria turnoff on Aquila-Coalcomán Rd.
	E. rufescens	CIG 473	MZFC 33124	E. rufescens MG857038	MG857038	19.85874	-103.80246	Mexico	Jalisco	Tapalpa-San Gabriel Hwy.
	E. rufescens	CIG 561	MZFC 33177	E. rufescens MG857062	MG857062	18.82636	-103.07295	Mexico	Michoacán	between Maruatilla and Nieves on Coalcomán-Dos Aguas Rd.
	E. rufescens	CIG 563	MZFC 33179	E. rufescens MG857060	MG857060	18.82636	-103.07295	Mexico	Michoacán	between Maruatilla and Nieves on Coalcomán-Dos Aguas Rd.
	E. rufescens	CIG 565	MZFC 33181	E. rufescens MG857061	MG857061	18.82755	-103.01134	Mexico	Michoacán	immediately above Rancho Las Torrecillas, on Coalcomán-Dos Aguas Rd.
	E. rufescens	CIG 980	MZFC 33339	E. rufescens MG857064	MG857064	18.83005	-103.02862	Mexico	Michoacán	Rancho Las Torrecillas, on Coalcomán-Dos Aguas Rd.
	E. rufescens	CIG 981	MZFC 33340	E. rufescens MG857065	MG857065	18.83005	-103.02862	Mexico	Michoacán	Rancho Las Torrecillas, on Coalcomán-Dos Aguas Rd.
	E. rufescens	JAC 25411	UTA A-62087	E. rufescens JAC 25411	OQ145307	18.41541	-102.55594	Mexico	Michoacán	Rd from Playitas to Microwave Towers (after logging station)
	E. rufescens	JAC 25412	UTA A-62088	E. rufescens JAC 25412	OQ145308	18.42956	-102.56711	Mexico	Michoacán	Rd from Playitas to Microwave Towers (after logging station)
5	E. saxatilis	TJD 895	IBH 34850	E. saxatilis TJD 895	MG857069	23.50424	-105.83682	Mexico	Sinaloa	carretera Concordia a Durango, 7.7 miles west of El Palmito
83	E. sentinelus	CIG 333	MZFC 33031	E. sentinelus MT872484	MT872484	17.98301	-101.21902	Mexico	Guerrero	At pass between Vallecitos and Los Fogones, Hwy. 134 (Zihuatanejo-Altamirano Hwy.)
	E. sentinelus	CIG 334	MZFC 33032	E. sentinelus MT872485	MT872485	17.98301	-101.21902	Mexico	Guerrero	At pass between Vallecitos and Los Fogones, Hwy. 134 (Zihuatanejo-Altamirano Hwy.)
	E. sentinelus	CIG 335	MZFC 33033	E. sentinelus MT872486	MT872486	17.98301	-101.21902	Mexico	Guerrero	At pass between Vallecitos and Los Fogones, Hwy. 134 (Zihuatanejo-Altamirano Hwy.)
72	E. sp. aff. petersi	CIG 311	MZFC 33011	E. sp. aff. petersi MG857033	MG857033	19.64975	-102.91845	Mexico	Jalisco	5.7 km S of El Montoso
137	E. sp. aff. petersi	ANMO 784	MZFC 15708	E. sp. aff. petersi ANMO 784	OQ145310	17.51052	-97.51755	Mexico	Oaxaca	Afueras de Guadalupe Tixa (desviación a Guadalupe Tixa aproximadamente 3.3 km (por carr) de San Pedro Teposcolula hacia Tlaxiaco)
	E. sp. aff. petersi	CIG 310	MZFC 33010	E. sp. aff. petersi MT872487	MT872487	19.64975	-102.91845	Mexico	Jalisco	5.7 km S of El Montoso
159	E. symingtoni	172583	No voucher	E. symingtoni EF493643	EF493643	22.77	-82.99	Cuba	--	Pinar Del Rio, Soroa
119	E. syristes	TJD 772	MVZ 264791	E. syristes TJD 772	OQ145319	17.31896	-99.47241	Mexico	Guerrero	Agua del Obispo
127	E. syristes	ANMO 2999	MZFC 28682	E. syristes ANMO 2999	OQ311401	17.06114	-98.76447	Mexico	Guerrero	Carretera de San Luis Acatlán a Malinaltepec; entre San Luis Acatlán y Tres Marías
130	E. syristes	ANMO 2992	MZFC 28679	E. syristes ANMO 2992	OQ145315	17.08456	-98.74883	Mexico	Guerrero	Carretera de San Luis Acatlán a Malinaltepec; entre San Luis Acatlán y Tres Marías
131	E. syristes	CIG 434	MZFC 33101	E. syristes MT872472	MT872472	17.12294	-98.70519	Mexico	Guerrero	between Puerto El Guayabo and El Espino Blanco, San Luis Acatlán-Tlapa de Comonfort Hwy.
132	E. syristes	JAC 25702	UTA A-61581	E. syristes JAC 25702	OQ311402	17.17068	-98.68065	Mexico	Guerrero	Sierra de Malinaltepec, carretera San Luis Acatlán-Tlapa de Comonfort
134	E. syristes	ANMO 1992		E. syristes ANMO 1992	OQ145314	16.9525	-97.7783	Mexico	Oaxaca	1 km N la Pedrera, mpio de Santa Lucía Monteverde
135	E. syristes	CIG 714	MZFC 33247	E. syristes MG857072	MG857072	17.02	-97.77	Mexico	Oaxaca	Santa María Yucuhiti
140	E. syristes	CIG 713	MZFC 33246	E. syristes MT872470	MT872470	17.078	-96.738	Mexico	Oaxaca	Colonia Niños Heroes, Oaxaca City
141	E. syristes	CIG 628	MZFC 33208	E. syristes MG857073	MG857073	15.93813	-96.6084	Mexico	Oaxaca	Between La Unión and San Francisco Loxicha
142	E. syristes	JJW 909	MZFC 15856	E. syristes JJW 909	OQ145318	15.99483	-96.5345	Mexico	Oaxaca	24.5 km N Candelaria on Hwy 175 to Miahuatlán
	E. syristes	ANMO 1066	MZFC 21686	E. syristes ANMO 1066	OQ145311	16.19298	-97.09789	Mexico	Oaxaca	Aprox. 8.2 km por carr 135 de Santa Rosa Lachao - Cerro del Vidrio
	E. syristes	ANMO 1067	MZFC 21687	E. syristes ANMO 1067	OQ145312	16.19298	-97.09789	Mexico	Oaxaca	Aprox. 8.2 km por carr 135 de Santa Rosa Lachao - Cerro del Vidrio
	E. syristes	ANMO 1960		E. syristes ANMO 1960	OQ145313	16.97083	-97.81683	Mexico	Oaxaca	carretera San Pedro Siniyuvi-Llano Grande
	E. syristes	CIG 1233	MZFC 33360	E. syristes MT872427	MT872427	16.0475	-96.50639	Mexico	Oaxaca	San Pedro el Alto, Sierra Madre del Sur
	E. syristes	CIG 431	MZFC 33098	E. syristes MT872471	MT872471	17.12294	-98.70519	Mexico	Guerrero	between Puerto El Guayabo and El Espino Blanco, San Luis Acatlán-Tlapa de Comonfort Hwy.
	E. syristes	CIG 435	MZFC 33102	E. syristes MG857071	MG857071	17.12294	-98.70519	Mexico	Guerrero	between Puerto El Guayabo and El Espino Blanco, San Luis Acatlán-Tlapa de Comonfort Hwy.
	E. syristes	CIG 627	MZFC 33207	E. syristes MT872467	MT872467	15.93813	-96.6084	Mexico	Oaxaca	Between La Unión and San Francisco Loxicha
	E. syristes	CIG 954	MZFC 33324	E. syristes MG857070	MG857070	17.3289	-99.46985	Mexico	Guerrero	Agua del Obispo
	E. syristes	GP 2201	IBH 32728	E. syristes MZ203204	MZ203204	15.96236	-96.56975	Mexico	Oaxaca	San Agustin Loxicha, Rancho Magnolia
	E. syristes	JAC 21385	UTA A-54800	E. syristes JAC 21385	OQ145316	15.97944	-96.51667	Mexico	Oaxaca	Carretera San José Pacífico-Candelaria Loxicha
	E. syristes	JAC 25700	UTA A-61579	E. syristes JAC 25700	OQ145317	17.17068	-98.68065	Mexico	Guerrero	Sierra de Malinaltepec, carretera San Luis Acatlán-Tlapa de Comonfort
	E. syristes	JAC 25701	UTA A-61580	E. syristes JAC 25701	OQ408143	17.17068	-98.68065	Mexico	Guerrero	Sierra de Malinaltepec, carretera San Luis Acatlán-Tlapa de Comonfort
	E. syristes	JAC 25703	UTA A-61582	E. syristes JAC 25703	OQ408142	17.17068	-98.68065	Mexico	Guerrero	Sierra de Malinaltepec, carretera San Luis Acatlán-Tlapa de Comonfort
14	E. teretistes	CIG 866	MZFC 33279	E. teretistes MG857077	MG857077	20.68941	-104.87471	Mexico	Jalisco	W of Mascota
15	E. teretistes	JAC 23703	UTA A-59515	E. teretistes JAC 23703	OQ145320	20.69364	-104.87345	Mexico	Jalisco	Carretera La Estancia-La Mascota a El Real Alto
16	E. teretistes	JAC 23671	UTA A-59510	E. teretistes JAC 23671	OQ311403	20.69785	-104.87176	Mexico	Jalisco	Carretera La Estancia-La Mascota
17	E. teretistes	GP 2393	IBH 32719	E. teretistes MZ203190	MZ203190	20.69496	-104.87079	Mexico	Jalisco	Sierra Mascota, on the road to ejido El Atajo
20	E. teretistes	CIG 864	MZFC 33277	E. teretistes MG857076	MG857076	20.69802	-104.86718	Mexico	Jalisco	W of Mascota
24	E. teretistes	CIG 491	MZFC 33142	E. teretistes MG857074	MG857074	20.21054	-104.75244	Mexico	Jalisco	Just below Bosque de Maple Trailhead, below Peña del Cuervo, Cumbre de Guadalupe, Talpa de Allende
	E. teretistes	CIG 492	MZFC 33143	E. teretistes MG857075	MG857075	20.21054	-104.75244	Mexico	Jalisco	Just below Bosque de Maple Trailhead, below Peña del Cuervo, Cumbre de Guadalupe, Talpa de Allende
40	E. wixarika	JRV 159	MZFC 27477	E. wixarika MG857080	MG857080	22.05943	-103.93398	Mexico	Jalisco	Sierra Huichola, Bajio de los Amoles
	E. wixarika	JRV 160	MZFC 27478	E. wixarika MG857081	MG857081	22.05943	-103.93398	Mexico	Jalisco	Sierra Huichola, Bajio de los Amoles
160	E. zeus	172582	USNM 335740	E. zeus EF493718	EF493718	22.4111	-83.68902	Cuba	--	Pinar del Rio, San Vicente
